# Supplementary material for: Competence Ratings in Psychotherapy Training – A Complex Matter
Source: Springer Nature journal article supplement (doi:10.1007/s10608-023-10445-x), 2023-10-11

## Supplementary Material

### Supplement 1

#### *Interrater Reliabilities for the Novice A Dyad Comparing Video Perspectives*

|        | Standard perspective             | Three perspectives               | <i>z</i> | <i>p</i> |
|--------|----------------------------------|----------------------------------|----------|----------|
| CTS    | .79 [.68, .86]<br><i>n</i> = 179 | .76 [.47, .87]<br><i>n</i> = 176 | .70      | .241     |
| CCSS-S | .66 [.52, .76]<br><i>n</i> = 172 | .65 [.44, .77]<br><i>n</i> = 172 | .16      | .436     |
| HAQ    | .74 [.59, .83]<br><i>n</i> = 179 | .75 [.62, .83]<br><i>n</i> = 176 | -.21     | .417     |
| ES     | .68 [.56, .76]<br><i>n</i> = 179 | .63 [.50, .73]<br><i>n</i> = 176 | .82      | .206     |

*Note.* Intraclass correlation coefficients and 95% confident intervals based on mean ratings (*k* = 2), absolute agreement, 2-way random effects model (ICC<sub>(2,2)</sub>). CTS = Cognitive Therapy Scale. CCSS-S = Clinical Communication Skills Scale – Short Form. HAQ = Helping Alliance Questionnaire. ES = Empathy Scale.

## Supplement 2

*Development of IRR for the CCSS based on the Number of Rated Videos*

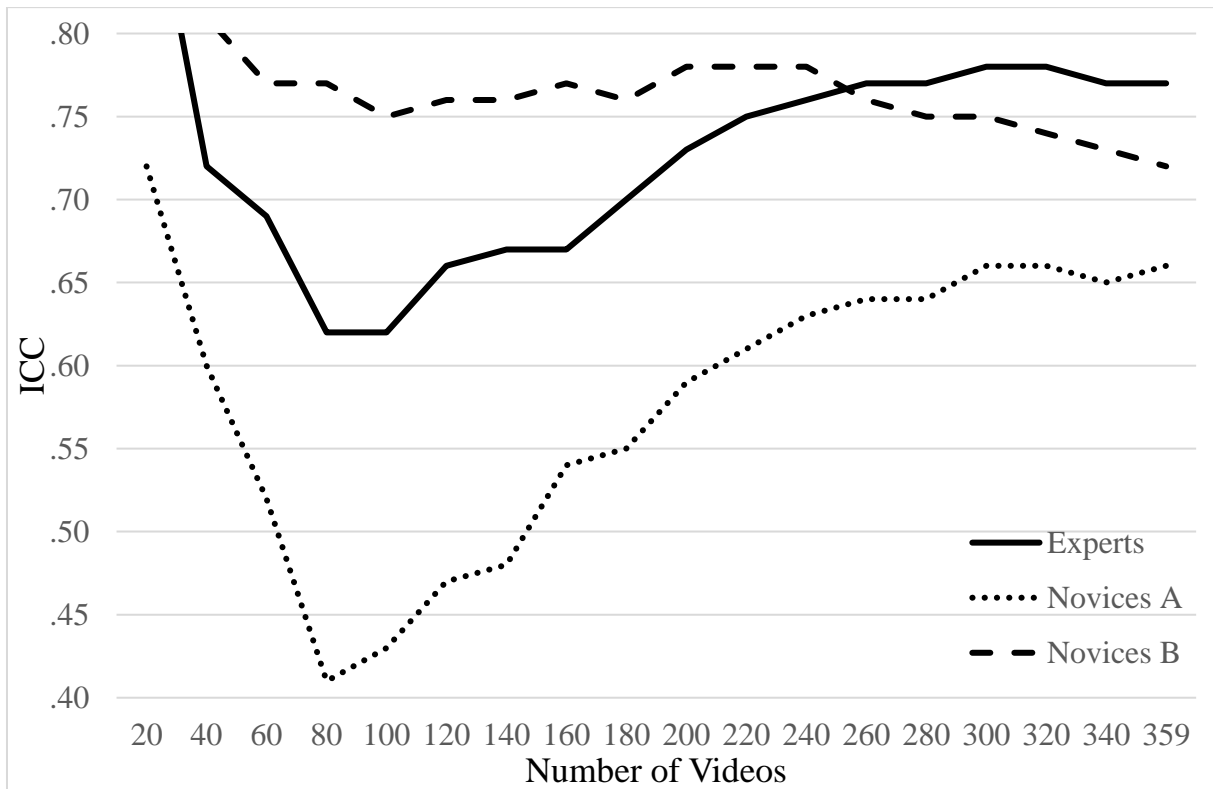

*Development of IRR for the HAQ based on the Number of Rated Videos*

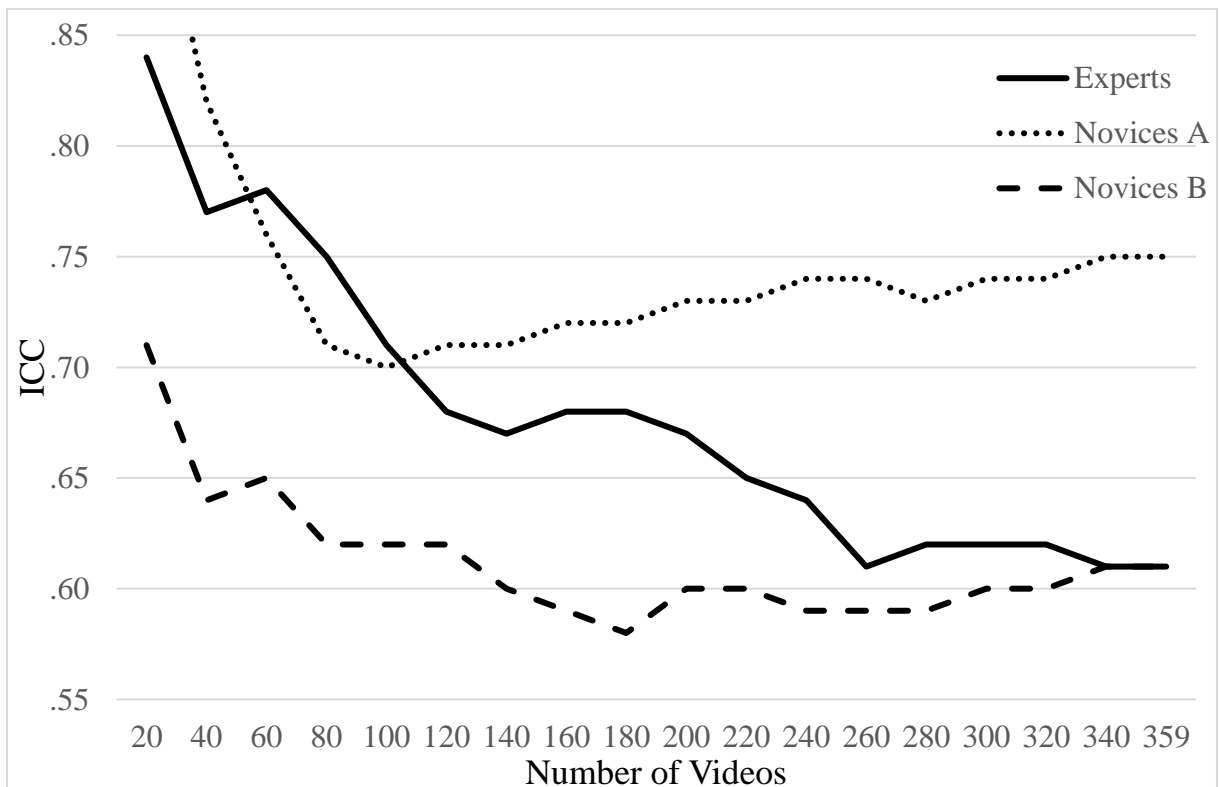

*Development of IRR for the ES based on the Number of Rated Videos*

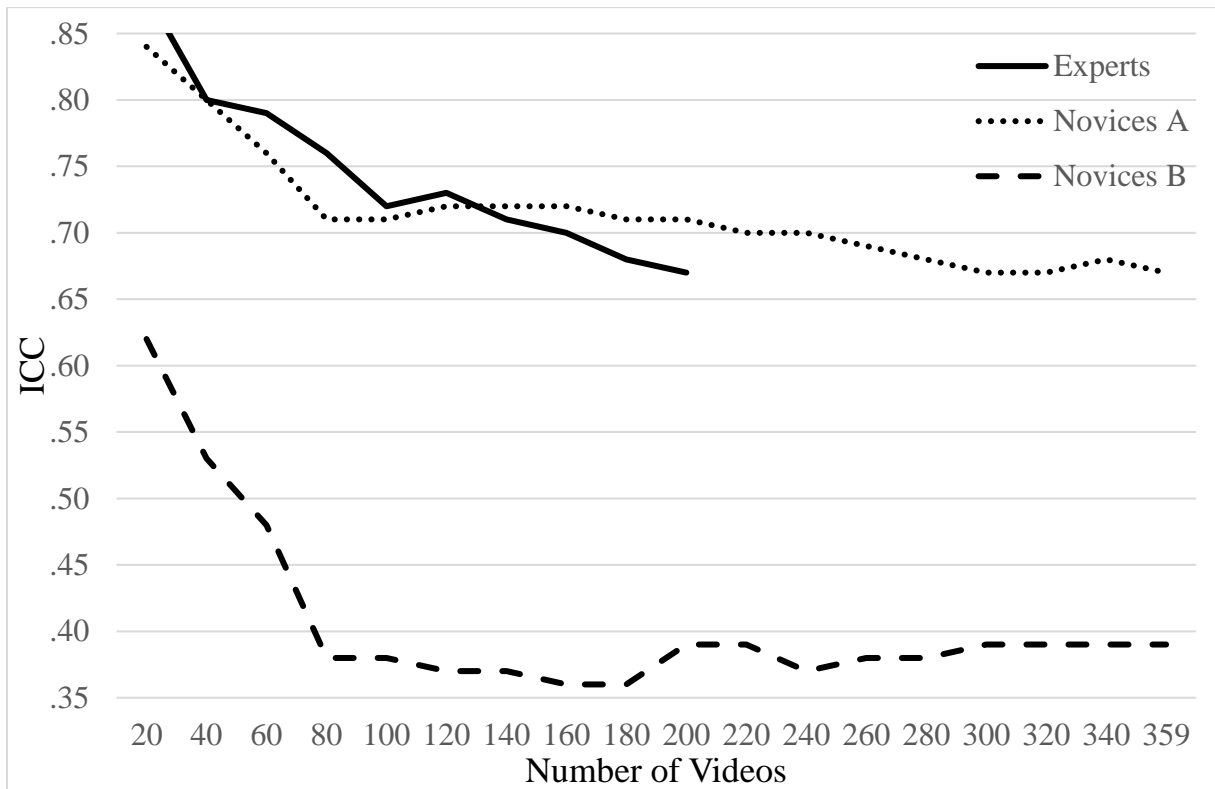

Supplement: MOESM1 [file 26150050]
